# Supplementary material
Source: PubMed Central journal article supplement (PMC4281848)
Supplement: Supp_Fig6.pdf [file Supp_Fig6.pdf]

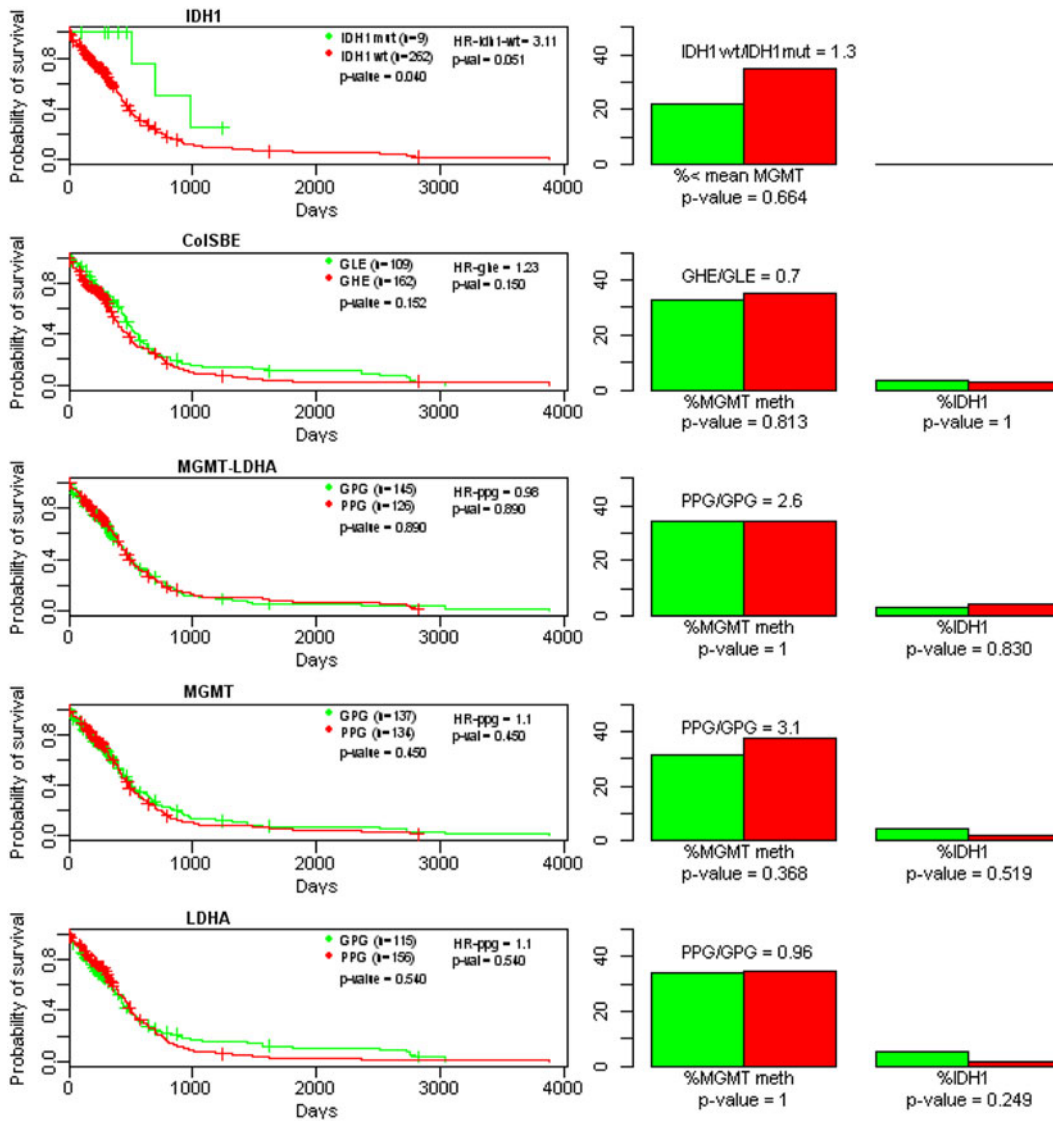

**SUPPLEMENTARY FIG. S6.** Survival and molecular features of LDA functions and IDH1 mutational status based on 271 TCGA cases. *Left plots* are survival curves based on classification provided by the *IDH1* status and by the LDA functions fitted with *CoISBE*, *MGMT-LDHA*, *MGMT*, or *LDHA* expression values (Equations 1–4). The discriminant scores for classification were computed by multiplying standardized values from TCGA data by the discriminant coefficients obtained from our training RT-PCR data ( $n=35$ , Equations 1–4). The cut-off to classify in one of two groups was set to zero. The  $p$  value indicates the probability that curves are equal. Plots on the *right* depict the percentage of cases showing an *MGMT* expression below the average of all cases and the percentage of cases showing *IDH1* mutation in each group. The  $p$  value denotes the probability that proportions are equal.
