# Supplementary material
Source: PubMed Central journal article supplement (PMC4281848)
Supplement: Supp_Fig7.pdf [file Supp_Fig7.pdf]

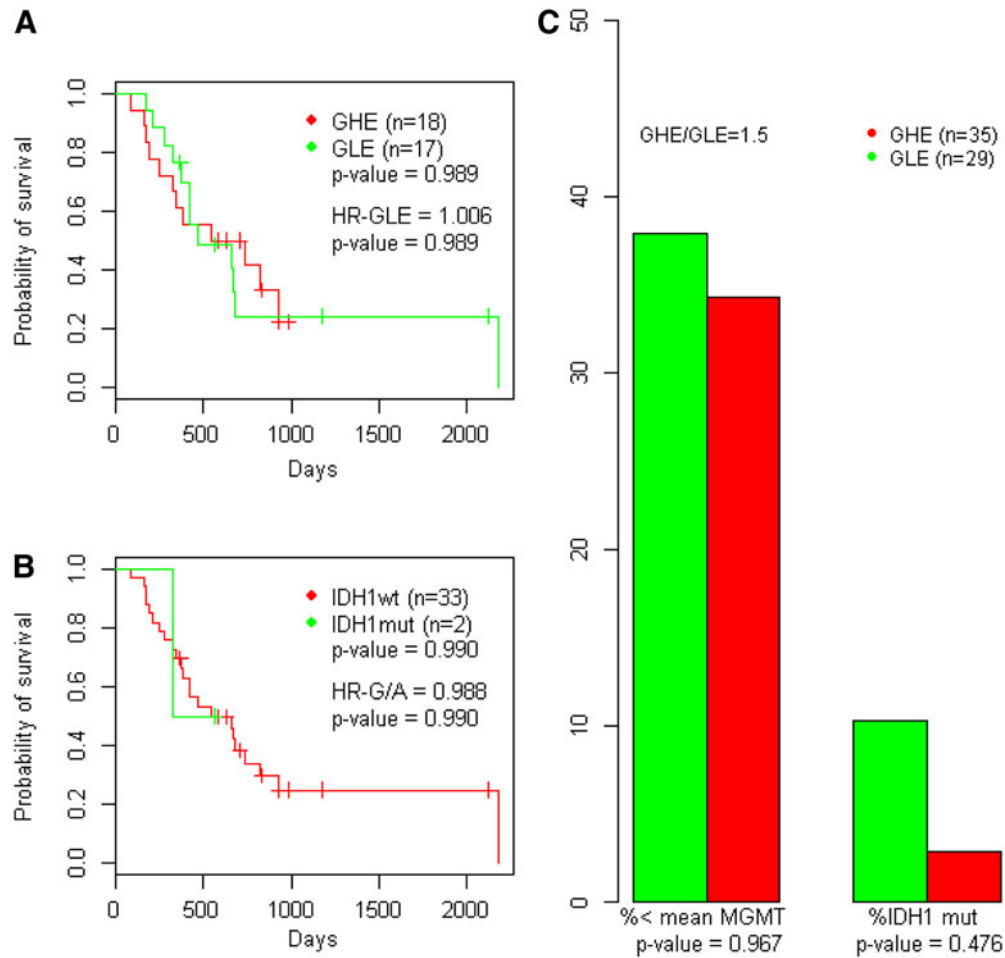

**SUPPLEMENTARY FIG. S7.** Survival and molecular features of CoLSBE based on classification obtained from microarrays experiments for the 42 training cases. The test cases ( $n=22$ ) were classified as group of low and high expression (GLE and GHE) using Equation 1. In contrast, the original CoLSBE label obtained from microarrays data was set to the training cases ( $n=42$ ). **(A)** Survival curves based on CoLSBE as classified by the LDA equation using standardized Ct values for those cases with survival data available. **(B)** Survival curves for patients harboring or not the IDH1 mutation. In each plot, the amount of cases per group is shown and below its associated  $p$  value, which indicates the probability that curves are equal. Below that, the death hazard ratio (HR) computed from the Cox's proportional hazard model is depicted, as well as the  $p$  value providing the probability that the HR is different than zero. **(C)** This figure summarizes the molecular features based on *MGMT* expression and *IDH1* mutational status (codon 132). The *left-side bars* describe the percentage of cases below the *MGMT* average expression by CoLSBE group, while the *right-side bars* provide the percentage of cases showing *IDH1* mutation in each CoLSBE group. The GHE/GLE indicates the fold-change between groups for the *MGMT* expression levels. The  $p$  value denotes the probability that proportions are equal.
