# Supplementary material
Source: PubMed Central journal article supplement (PMC4281848)
Supplement: Supp_Fig10.pdf [file Supp_Fig10.pdf]

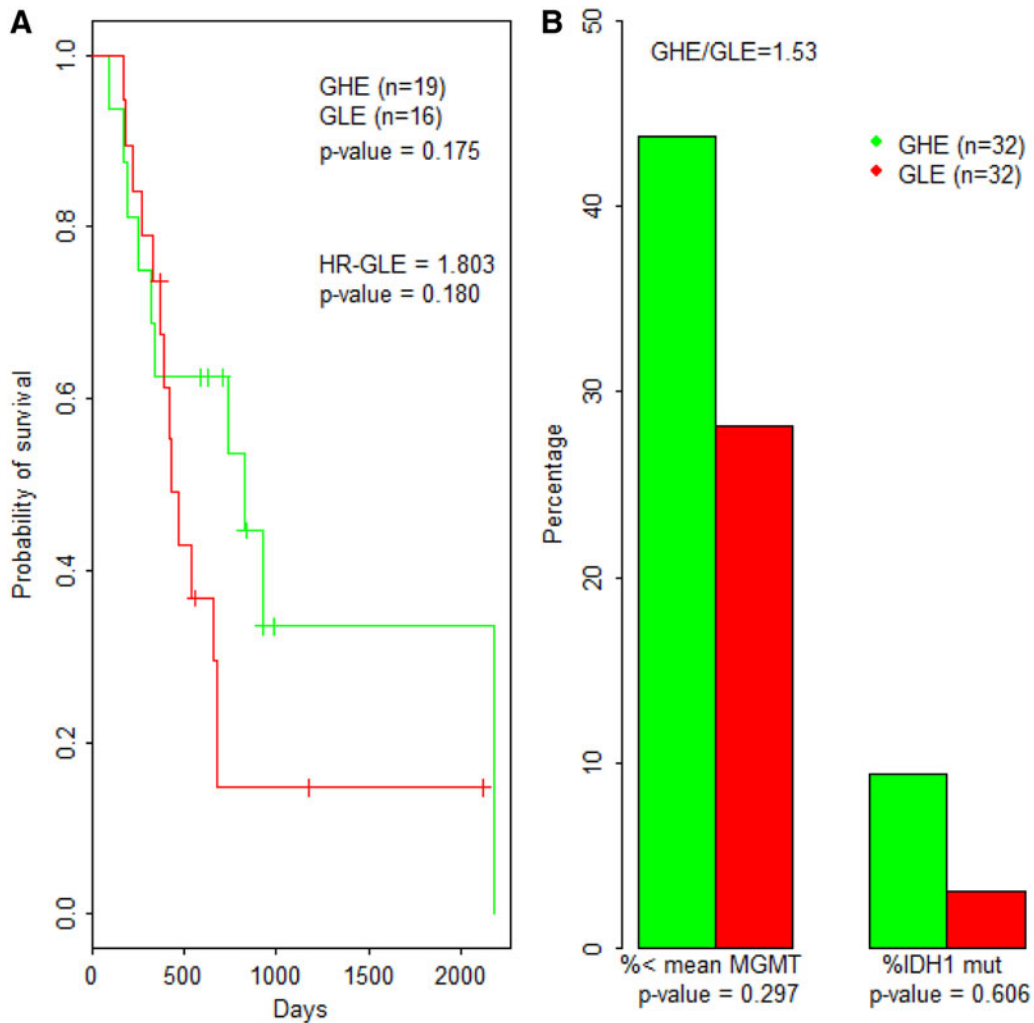

**SUPPLEMENTARY FIG. S10.** Survival and molecular features of CoLSBE based on classification obtained from Equation 2. All cases ( $n=64$ ) were classified as group of low and high expression (GLE and GHE) using Equation 2. **(A)** Survival curves based on CoLSBE as classified by the LDA equation using standardized Ct values for those cases with survival data available. **(B)** This figure summarizes the molecular features based on *MGMT* expression and *IDH1* mutational status (codon 132). The *left-side bars* describe the percentage of cases below the *MGMT* average expression by CoLSBE group, while the *right-side bars* provide the percentage of cases showing *IDH1* mutation in each CoLSBE group. The GHE/GLE indicates the fold-change between groups for the *MGMT* expression levels. The  $p$  value denotes the probability that proportions are equal.
