# Supplementary material
Source: PubMed Central journal article supplement (PMC4281848)
Supplement: Supp_Fig11.pdf [file Supp_Fig11.pdf]

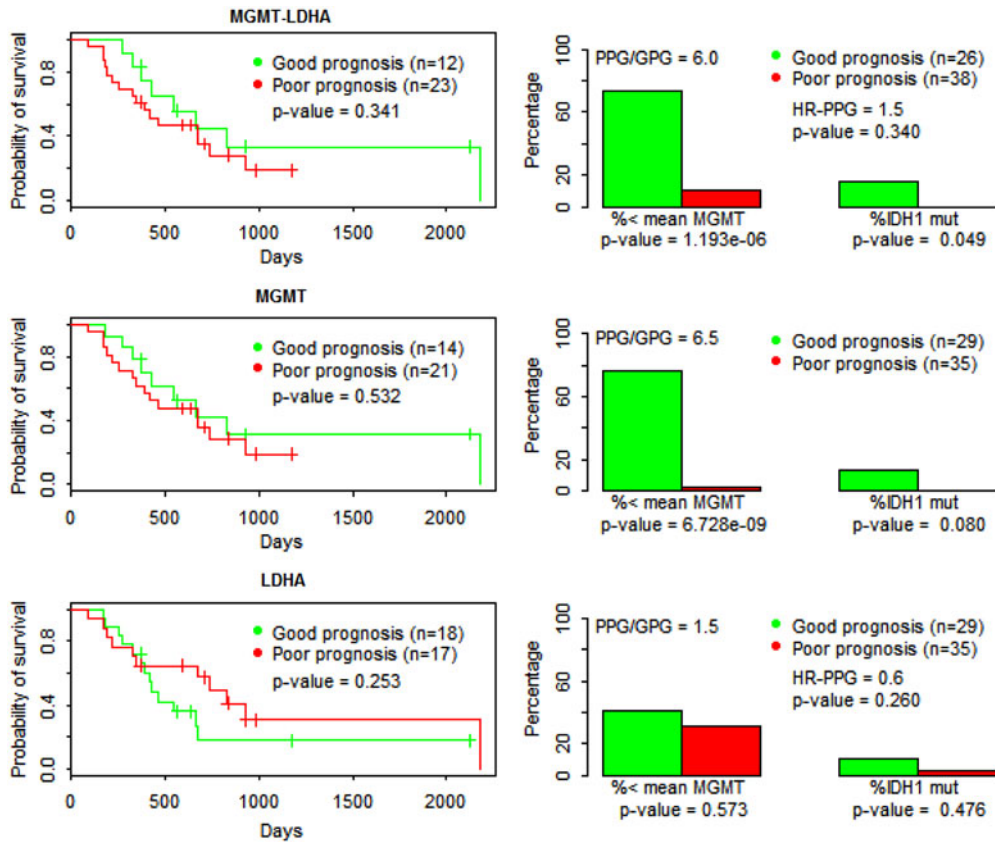

**SUPPLEMENTARY FIG. S11.** Survival and molecular features of CoLSBE based on classification obtained from Equations 6–8. All cases ( $n = 64$ ) were classified as group of good and poor prognosis (GPG and PPG) using Equations 6–8. *Left plots* are survival curves based on LDA functions fitted with either *MGMT-LDHA*, *MGMT*, or *LDHA* expression values. All samples having survival data available were used ( $n = 35$ ). The  $p$  value indicates the probability that curves are equal. *Plots on the right* depict the percentage of cases showing an *MGMT* expression below the average of all cases ( $n = 64$ ) and the percentage of cases showing *IDH1* mutation in each group (GPG and PPG). The  $p$  value denotes the probability that proportions are equal.
