# Supplementary material
Source: PubMed Central journal article supplement (PMC4281848)
Supplement: Supp_Fig13.pdf [file Supp_Fig13.pdf]

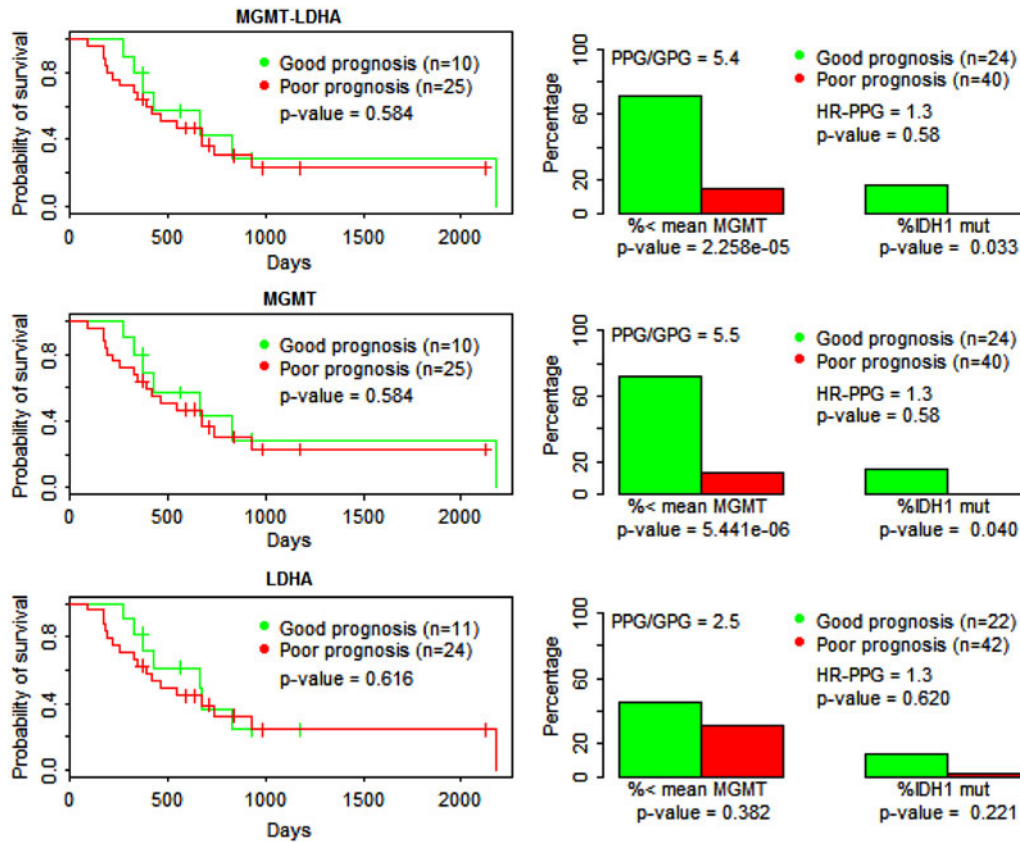

**SUPPLEMENTARY FIG. S13.** Survival and molecular features of ColSBE based on classification obtained from microarrays experiments for the 25 training cases. The test cases ( $n = 39$ ) were classified as group of good and poor prognosis (GPG and PPG) using Equations 6–8, while the original label obtained from Supplementary Figure S9 above was set to the training cases ( $n = 25$ ). *Left plots* are survival curves based on LDA functions fitted with either *MGMT-LDHA*, *MGMT*, or *LDHA* expression values. All samples having survival data available were used ( $n = 35$ ). The  $p$  value indicates the probability that curves are equal. *Plots on the right* depict the percentage of cases showing an *MGMT* expression below the average of all cases ( $n = 64$ ) and the percentage of cases showing an *IDH1* mutation in each group (GPG and PPG). The  $p$  value denotes the probability that proportions are equal.
