# Supplementary material
Source: PubMed Central journal article supplement (PMC4281848)

## Supplementary Data

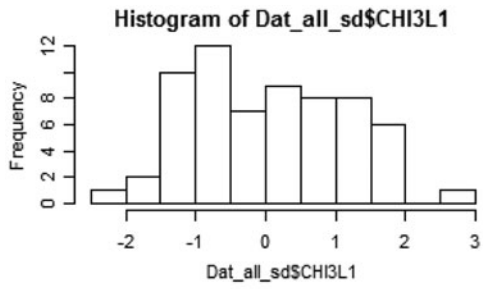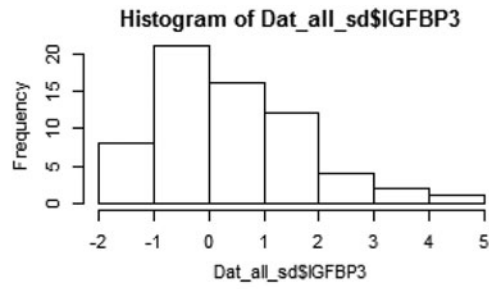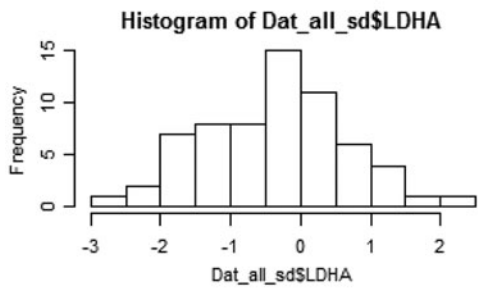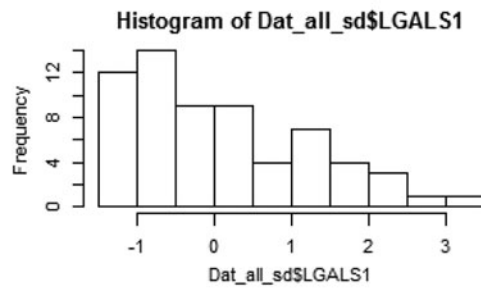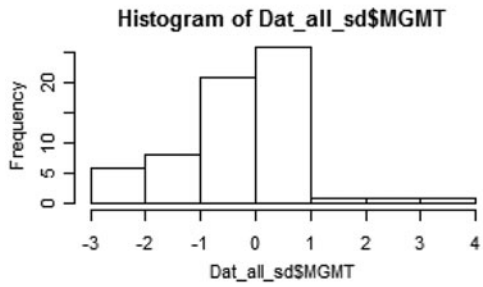

**SUPPLEMENTARY FIG. S1.** Distribution of Ct values per gene.

Supplement: Supp_Fig1.pdf [file Supp_Fig1.pdf]

**SUPPLEMENTARY FIG. S2.** Normal q-q plots per gene.

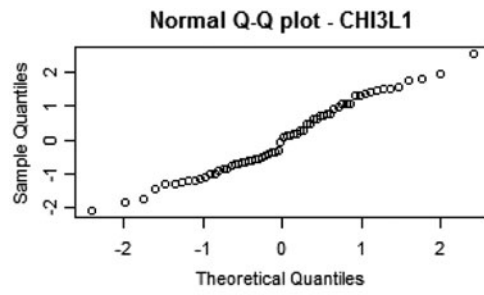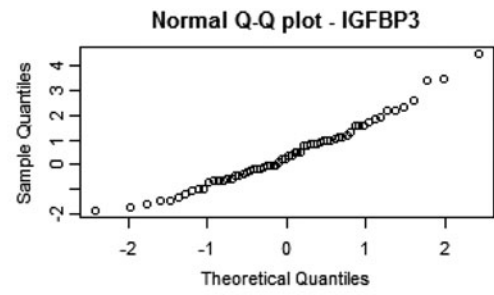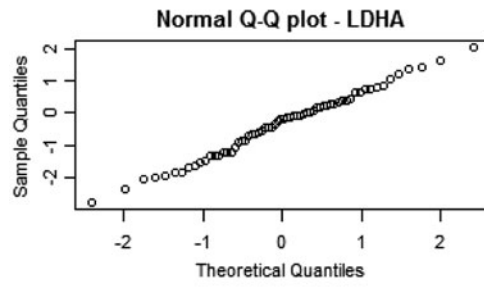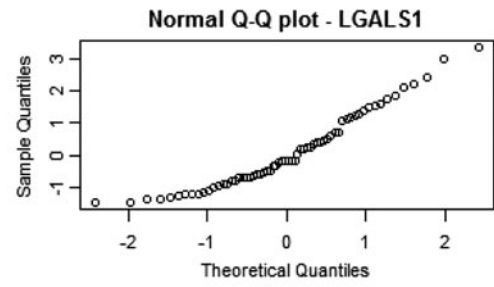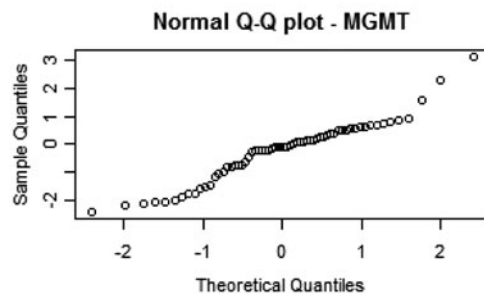

Supplement: Supp_Fig2.pdf [file Supp_Fig2.pdf]

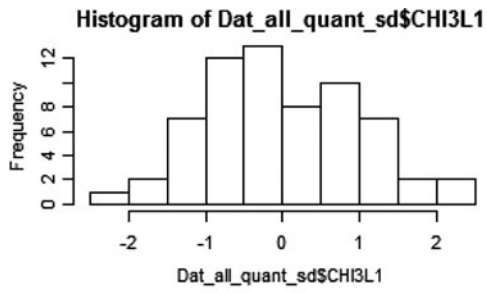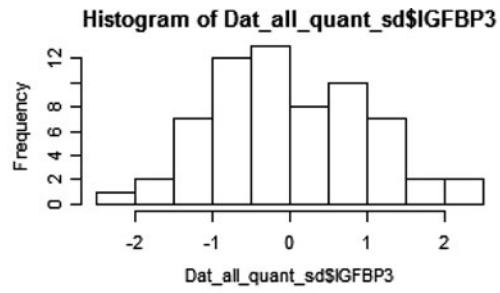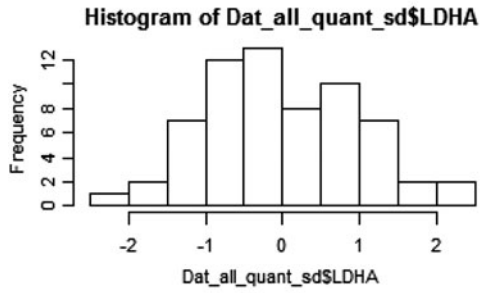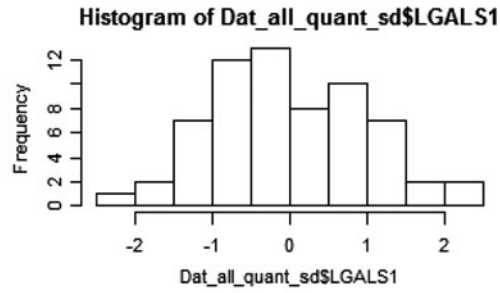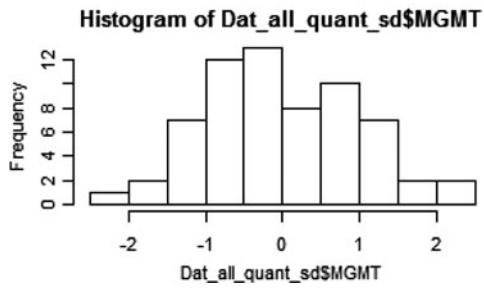

**SUPPLEMENTARY FIG. S3.** Distribution of Ct values per gene.

Supplement: Supp_Fig3.pdf [file Supp_Fig3.pdf]
